# Supplementary material
Source: PubMed Central journal article supplement (PMC5794426)
Supplement: 10.1194_M080382_jlr.M080382-1.pdf [file 10.1194_M080382_jlr.M080382-1.pdf]

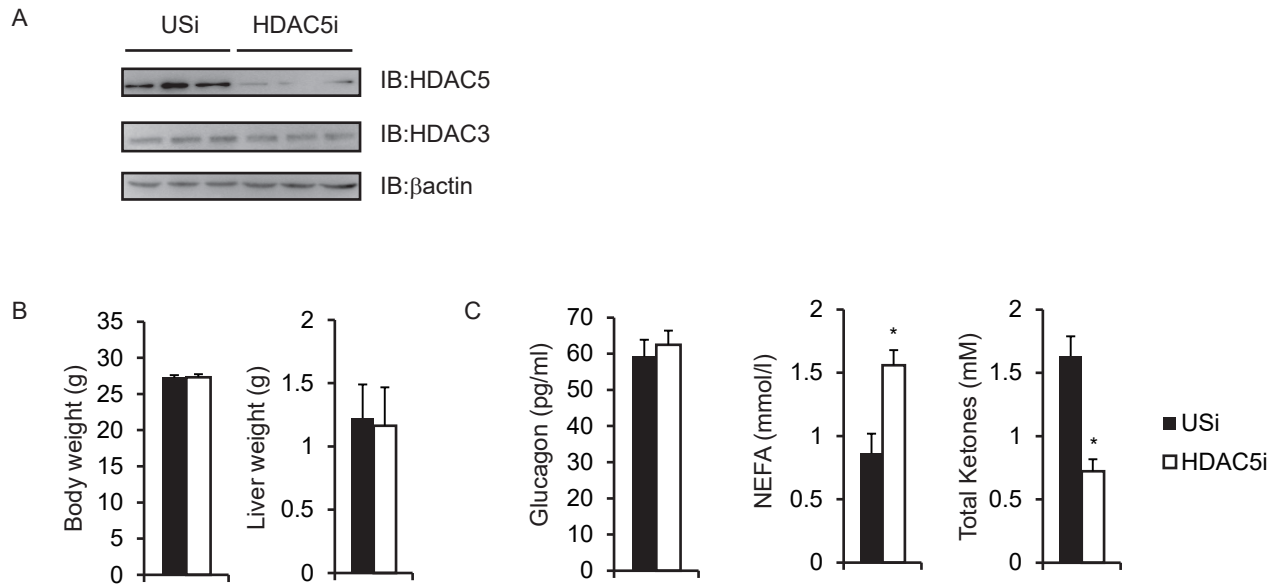

Fig. S1 Knockdown of HDAC5 leads to hepatic lipid deposits under fasted state. A, Immunoblot analysis of hepatic HDAC5 and HDAC3 levels in Ad-USi or Ad-HDAC5i injected RD-fed mice. B, Effect of Ad-USi or Ad-HDAC5i injection on body weight and liver weight of RD-fed mice (n = 8). C, Effect of Ad-USi or Ad-HDAC5i injection on plasma glucagon, NEFA and ketone levels in RD-fed mice (n = 8). All data are presented as mean $\pm$ s.e.m. \*P<0.05.
