# Supplementary material
Source: PubMed Central journal article supplement (PMC5794426)
Supplement: 10.1194_M080382_jlr.M080382-2.pdf [file 10.1194_M080382_jlr.M080382-2.pdf]

A

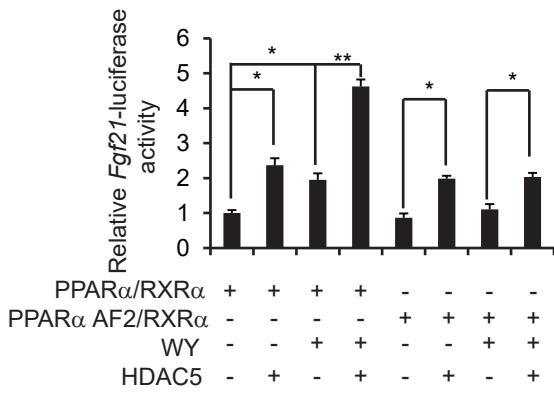

Fig. S2 PPARα ligand-independent effect of HDAC5 on Fgf21-luciferase reporter activity.

A, Effect of HDAC5 on PPARα AF2 mutant/RXRα induced Fgf21-luc reporter activity. HEK293T cells were transfected with Fgf21-luc, RSV-β-gal, PPARα or PPARα AF2 mutant, RXRα together with HDAC5 for 24 h and followed by WY stimulation for 24h (n = 3). All data are presented as mean±s.e.m. \*P<0.05, \*\*P<0.01.
