# Supplementary material
Source: PubMed Central journal article supplement (PMC5794426)
Supplement: 10.1194_M080382_jlr.M080382-3.pdf [file 10.1194_M080382_jlr.M080382-3.pdf]

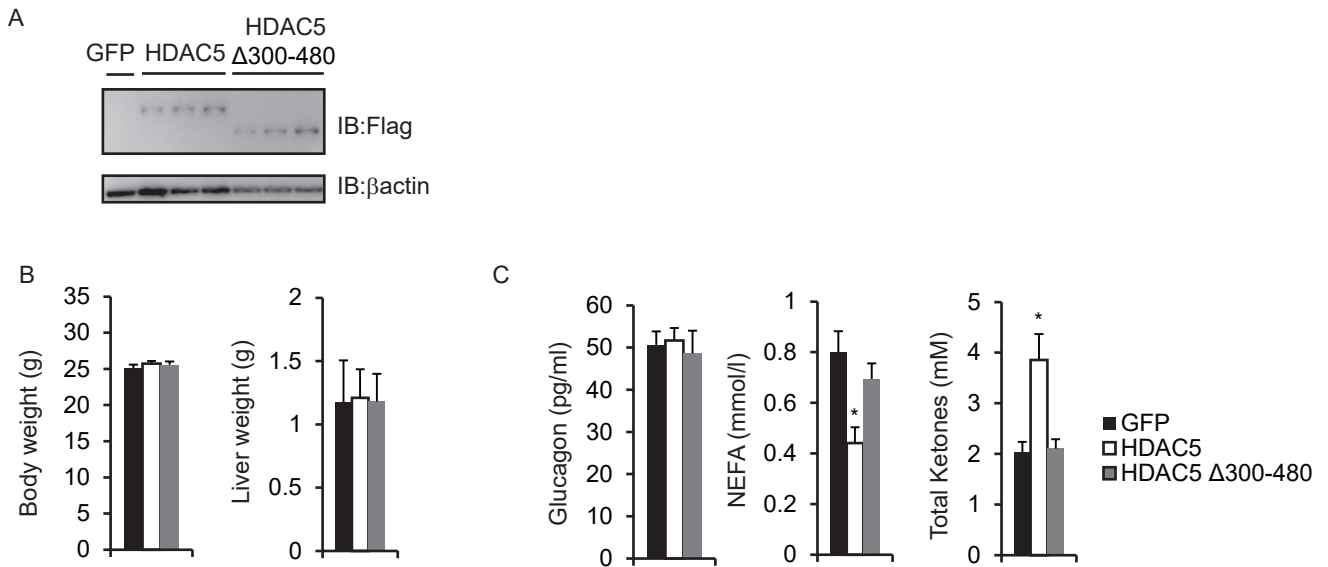

Fig. S3 HDAC5 but not HDAC5  $\Delta$ 300-480 expression promotes lipid homeostasis under fasted state. A, Immunoblot analysis of hepatic HDAC5 and HDAC5  $\Delta$ 300-480 levels in Ad-HDAC5, Ad-HDAC5  $\Delta$ 300-480 or Ad-GFP injected RD-fed mice. B, Effect of Ad-GFP, Ad-HDAC5 and Ad-HDAC5  $\Delta$ 300-480 injection on body weight and liver weight of RD-fed mice (n = 8). C, Effect of Ad-HDAC5, Ad-HDAC5  $\Delta$ 300-480 or Ad-GFP injection on plasma glucagon, NEFA and ketone levels in RD-fed mice (n = 8). All data are presented as mean  $\pm$  s.e.m. \*P < 0.05.
