# Supplementary material
Source: PubMed Central journal article supplement (PMC5794426)
Supplement: 10.1194_M080382_jlr.M080382-4.pdf [file 10.1194_M080382_jlr.M080382-4.pdf]

A

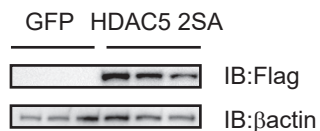

B

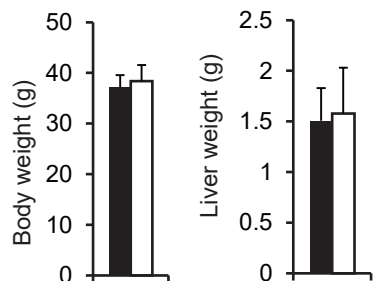

C

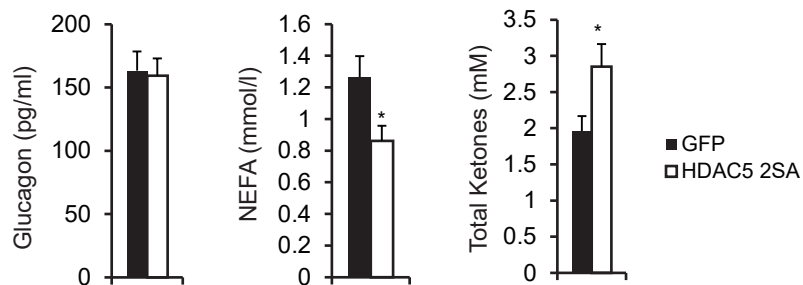

Fig. S4 HDAC5 2SA expression ameliorates HFD-induced hepatic steatosis.

A, Immunoblot analysis of hepatic HDAC5 2SA in Ad-HDAC5 2SA or Ad-GFP injected HFD-fed mice. B, Effect of Ad-HDAC5 2SA or Ad-GFP injection on body weight and liver weight of HFD-fed mice (n = 8). C, Effect of Ad-HDAC5 2SA or Ad-GFP injection on plasma glucagon, NEFA and ketone levels in HFD-fed mice (n = 8). All data are presented as mean±s.e.m. \*P<0.05.
