# Supplementary material
Source: PubMed Central journal article supplement (PMC5794426)
Supplement: 10.1194_M080382_jlr.M080382-5.pdf [file 10.1194_M080382_jlr.M080382-5.pdf]

A

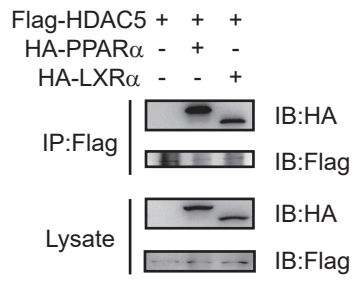

Fig. S5 HDAC5 interacts with LXR $\alpha$ .

A, Interaction between Flag-tagged HDAC5 and HA-tagged PPAR $\alpha$  or HA-tagged LXR $\alpha$  in HEK293T cells.
